# Supplementary material
Source: Research Square preprint supplement (doi:10.21203/rs.3.rs-9142053/v1)
Supplement: Supplementary file 1 [file a75286a72106c7db0efc5501.doc]

**Supplementary Appendix**

**Questionnaire and Observer Assessment Used in the Study:**

***Vision Restoration Enhances Appearance-Related Self-Care in Elderly Women After Cataract Surgery***

**Subjective Assessment (Completed by Participants)**

Response options for Questions I–VI:

1 = Strongly disagree 2 = Disagree 3 = Neutral 4 = Agree 5 = Strongly agree

**Ⅰ. Loneliness score**

Even when people are around me, I sometimes feel lonely.

[1 2 3 4 5]

**Ⅱ. Perceived social support score**

I feel that there is someone with whom I can share my worries or feelings.

[1 2 3 4 5]

**Ⅲ. Motivation to dress up**

When I go out or meet other people, I want to dress nicely.

[1 2 3 4 5]

**Ⅳ. Desire to maintain appearance**

I would like to remain well-groomed and maintain my appearance as I age.

[1 2 3 4 5]

**Ⅴ. Perceived barriers to dressing up**

I sometimes cannot dress up even if I want to because of vision problems, physical limitations, or transportation difficulties.

[1 2 3 4 5]

**Ⅵ. Social motivation associated with grooming**

When I take care of my appearance or dress up, I feel more motivated to go out and meet people.

[1 2 3 4 5]

**Ⅶ. Outdoor social activity frequency**

During the past month, how many times did you meet friends or acquaintances outside of hospital visits?

_____ times per month

**Ⅷ. Beauty service visit frequency (times/month)**

VIII. During the past month, how many times did you visit a hair salon, beauty salon, nail care, or foot care service?

_____ times per month

**Observer Assessment (Completed by Research Staff)**

Research staff evaluated the patient’s grooming and appearance during the clinical encounter.

1. Hair is well groomed (clean, styled, or use of hair products) □ Yes □ No
2. Wearing facial makeup (including light makeup) □ Yes □ No
3. Clothing is clean and well arranged □ Yes □ No
4. Wearing accessories or personal items □ Yes □ No
5. Nails are clean or well maintained □ Yes □ No

Total score: ____ (range 0–5)
